# Supplementary material for: Participation of Extracellular Vesicles from Zika-Virus-Infected Mosquito Cells in the Modification of Naïve Cells’ Behavior by Mediating Cell-to-Cell Transmission of Viral Elements
Source: PubMed Central journal article supplement (PMC7016930; doi:10.3390/cells9010123), 2020-01-04
Supplement: cells-09-00123-s001.pdf [file cells-09-00123-s001.pdf]

## Supplementary Materials

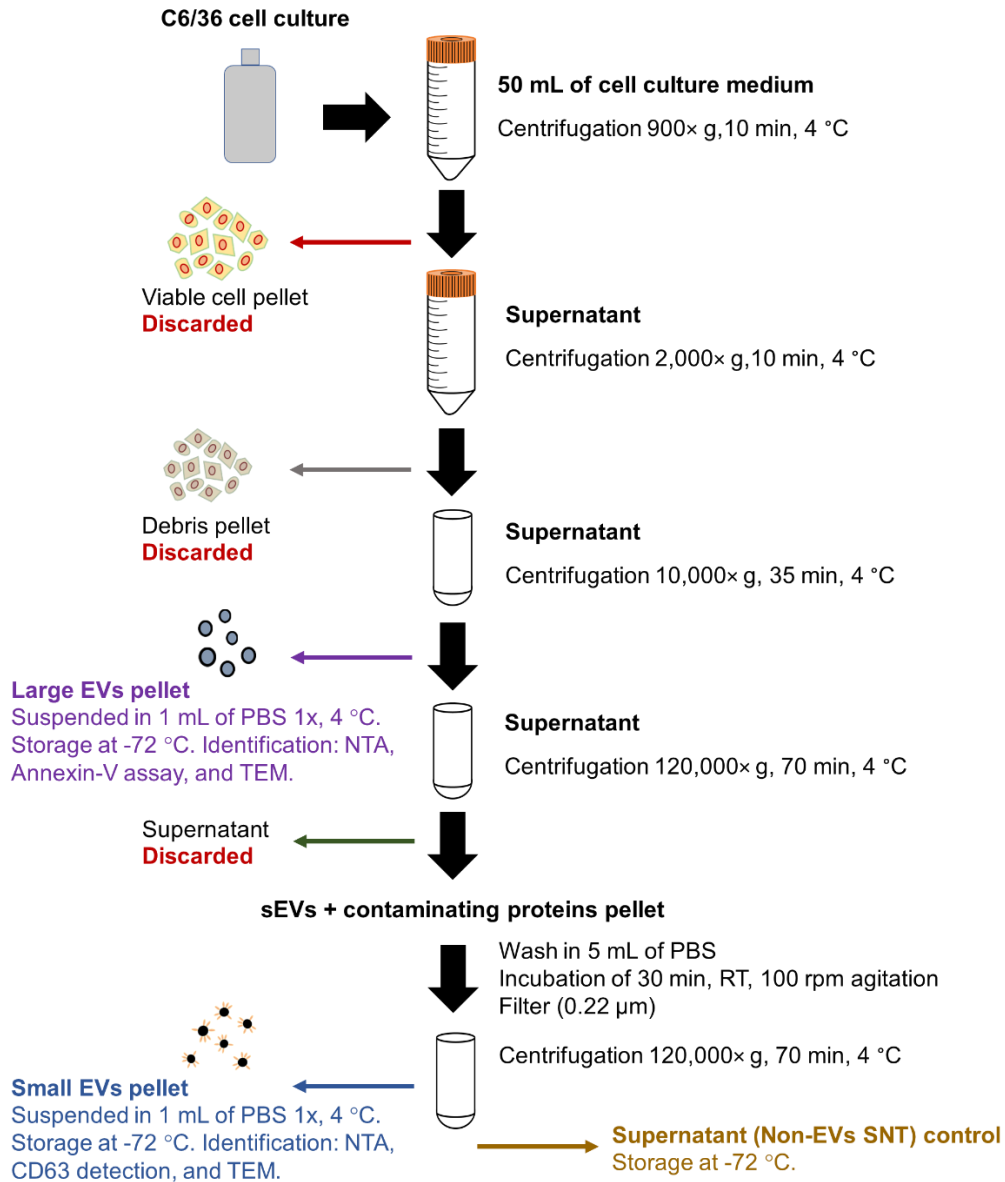

**Figure S1.** Graphic description of the EVs isolation by ultracentrifugation. NTA = Nanoparticles tracking analysis; TEM = Transmission electron microscopy; rpm = revolutions per minute.

**A**

| Nanoparticles Tracking Analysis (NTA) |                      |                    |
|---------------------------------------|----------------------|--------------------|
| Parameter                             | Evaluated conditions | Optimal conditions |
| Camera level                          | 10, 12, 14, 16       | 12                 |
| Detection threshold                   | 2.0, 2.5, 5.0        | 2.5                |
| Temperature (°C)                      | 15, 20, 25           | 20                 |
| Dilution                              | 1:25, 1:50, 1:100    | 1:50               |
| Diluent                               | PBS 1x, Water        | PBS 1x             |
| Load volume (mL)                      | 0.5, 1.0, 1.5        | 1.0                |
| Reading times (s)                     | 30, 60, 90           | 30                 |
| Repetitions                           | 2, 3, 5              | 3                  |

**B**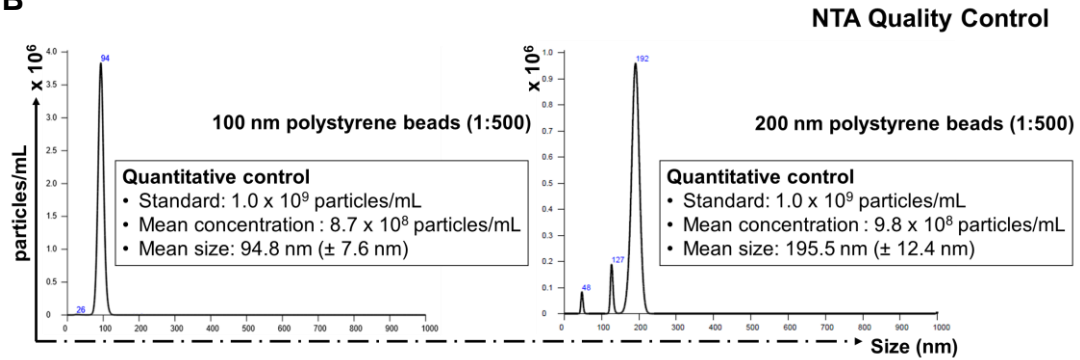**C**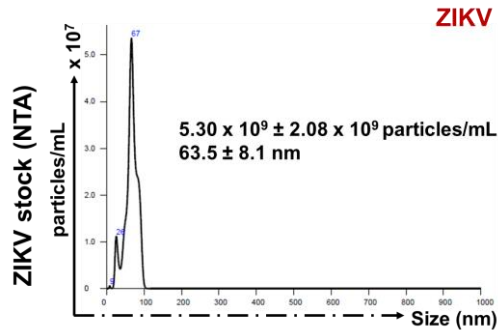

**Figure S2.** Nanoparticles Tracking Analysis (NTA) (A) Description of the evaluated and optimal conditions for nanoparticles quantification by NTA. (B) NTA quality control based on the optimal conditions established. Histograms are the representative of three independent experiments using polystyrene beads (100 and 200 nm) diluted at 1:500. (C) NTA of purified ZIKV stock. Histogram is the representative mean  $\pm$  SD of nanoparticles concentration (particles/mL) and size (nm) from three independent experiments.

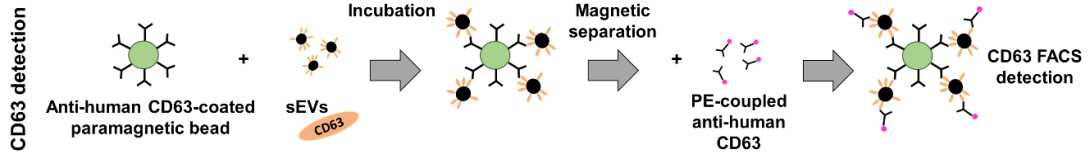

**Figure S3.** Detection of SEVs CD63+. Graphic description of sEVs CD63+ detection by magnetic separation with paramagnetic beads coated with anti-CD63.

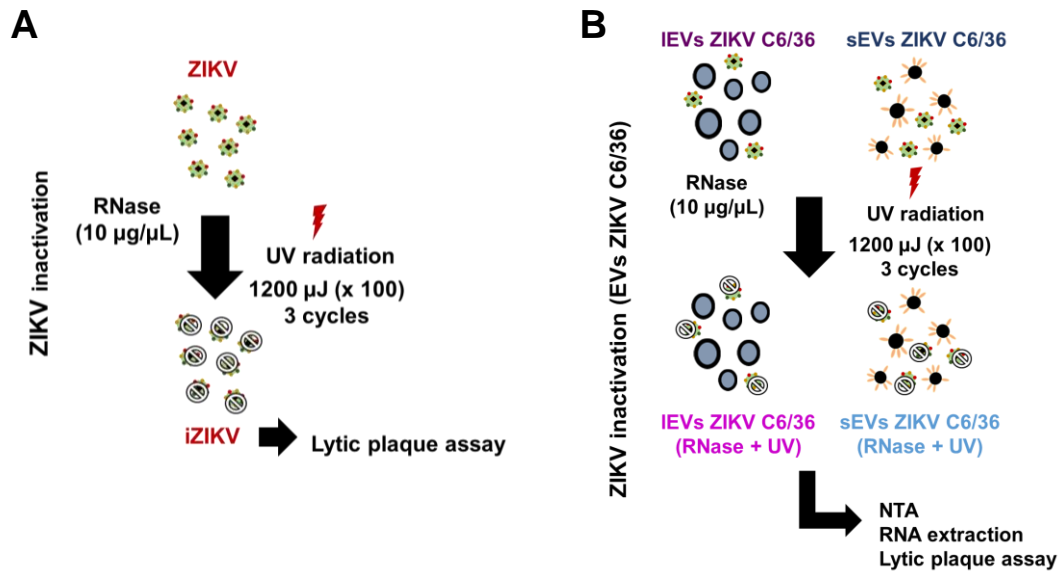

**Figure S4.** ZIKV inactivation. (A) Graphic description of RNase A assay and UV irradiation for ZIKV inactivation. iZIKV = inactivated ZIKV. (B) Graphic description of RNase A assay and UV irradiation for ZIKV inactivation on ZIKV-infected C6/36 EVs isolates.

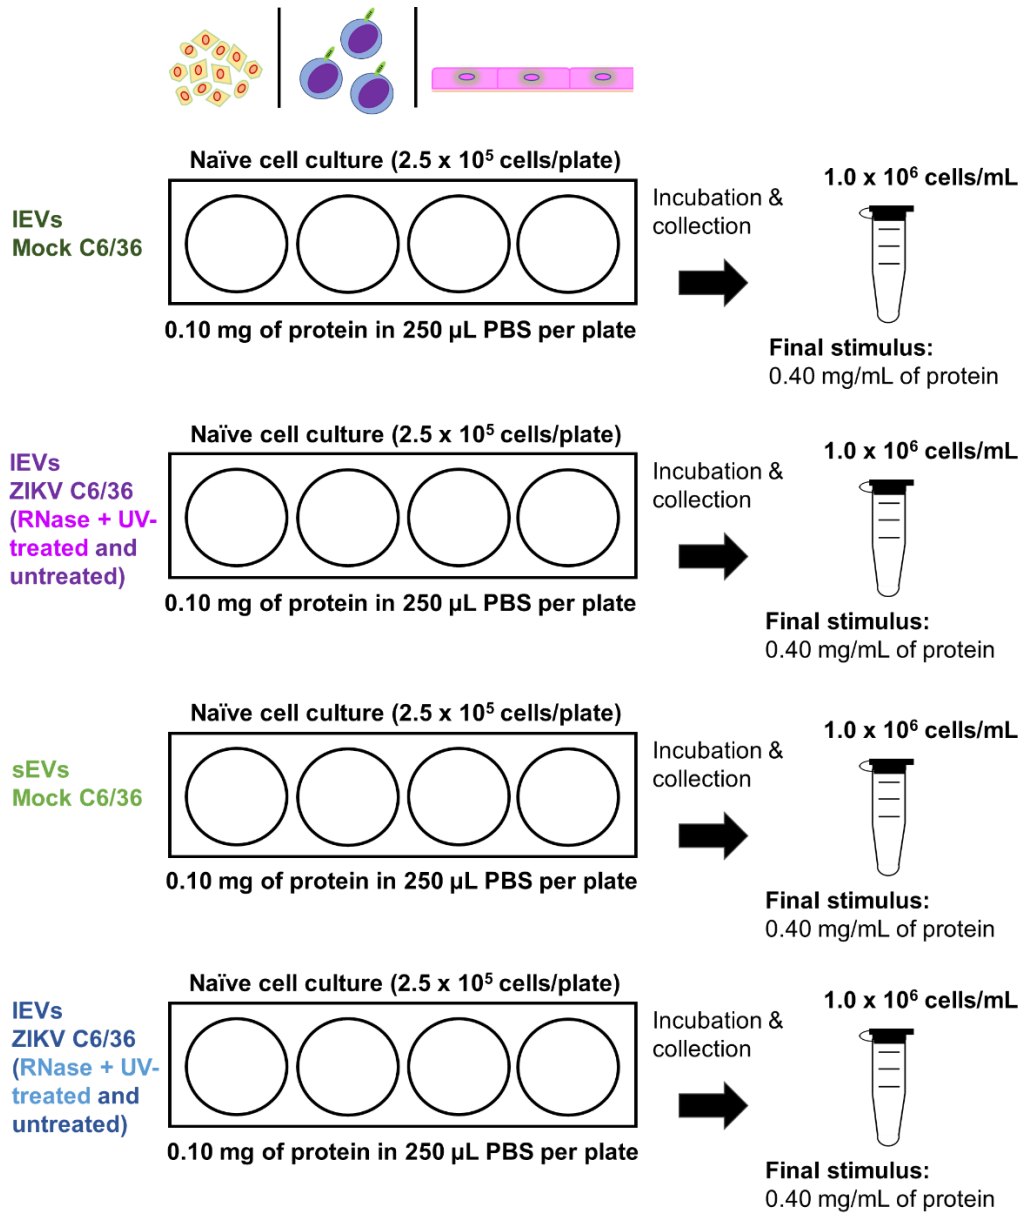

**Figure S5.** Graphic description of the EVs stimulation assays on naïve cells (C6/36, THP-1, or HMEC-1).

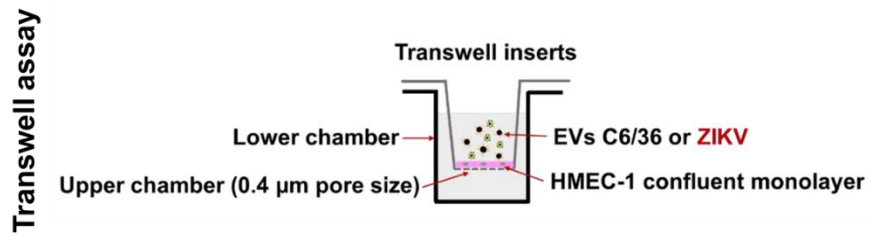

**Figure S6.** Vascular endothelial permeability assay. Graphic description of the Transwell system used in the vascular endothelial cells permeability assay.

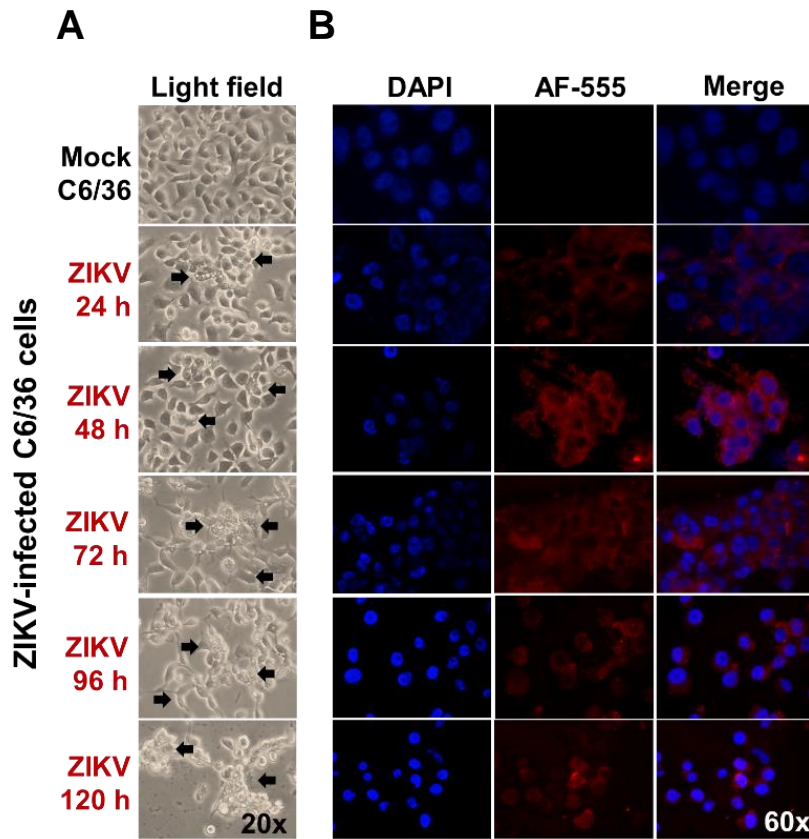

**Figure S7.** Microscopies from ZIKV-infected C6/36 cells. (A) Cytopathic effects observation at 24, 48, 72, 96, and 120 h PI (black arrows) evaluated by light-field microscopy (20x). (B) ZIKV E protein detection (red) by fluorescence microscopy (60x).

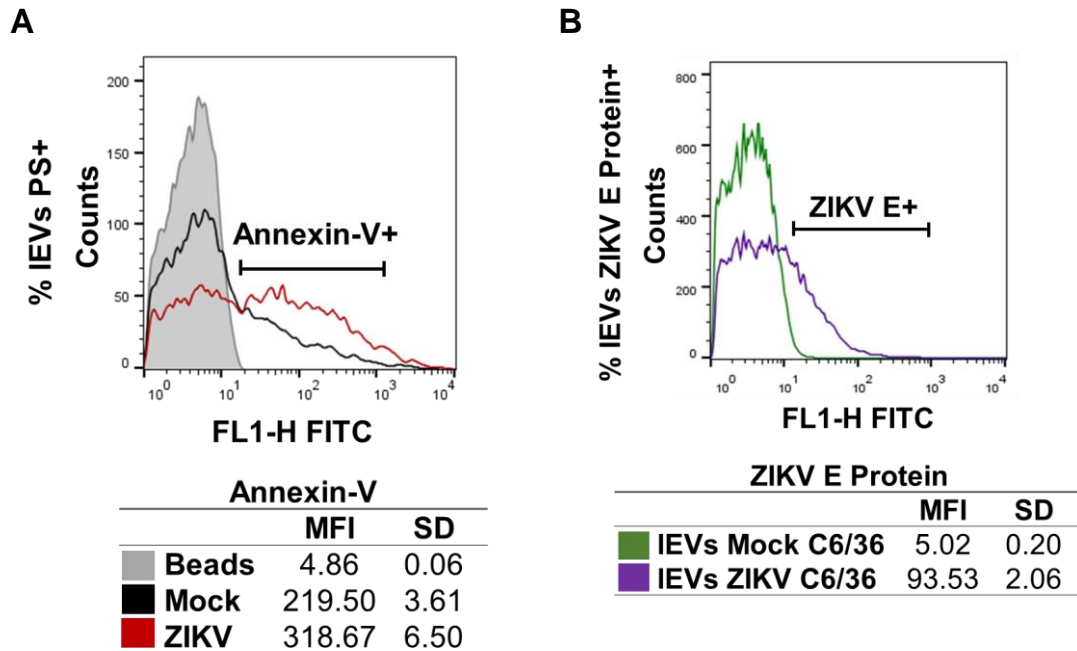

**Figure S8.** Mean fluorescence intensity (MFI) values from FACS assays performed on IEVs isolates. **(A)** Annexin-V binding MFI values. Histograms are the representative of IEVs PS+ distribution from three independent experiments. **(B)** ZIKV E Protein MFI values. Histograms are the representative of IEVs ZIKV E Protein+ distribution from three independent experiments.

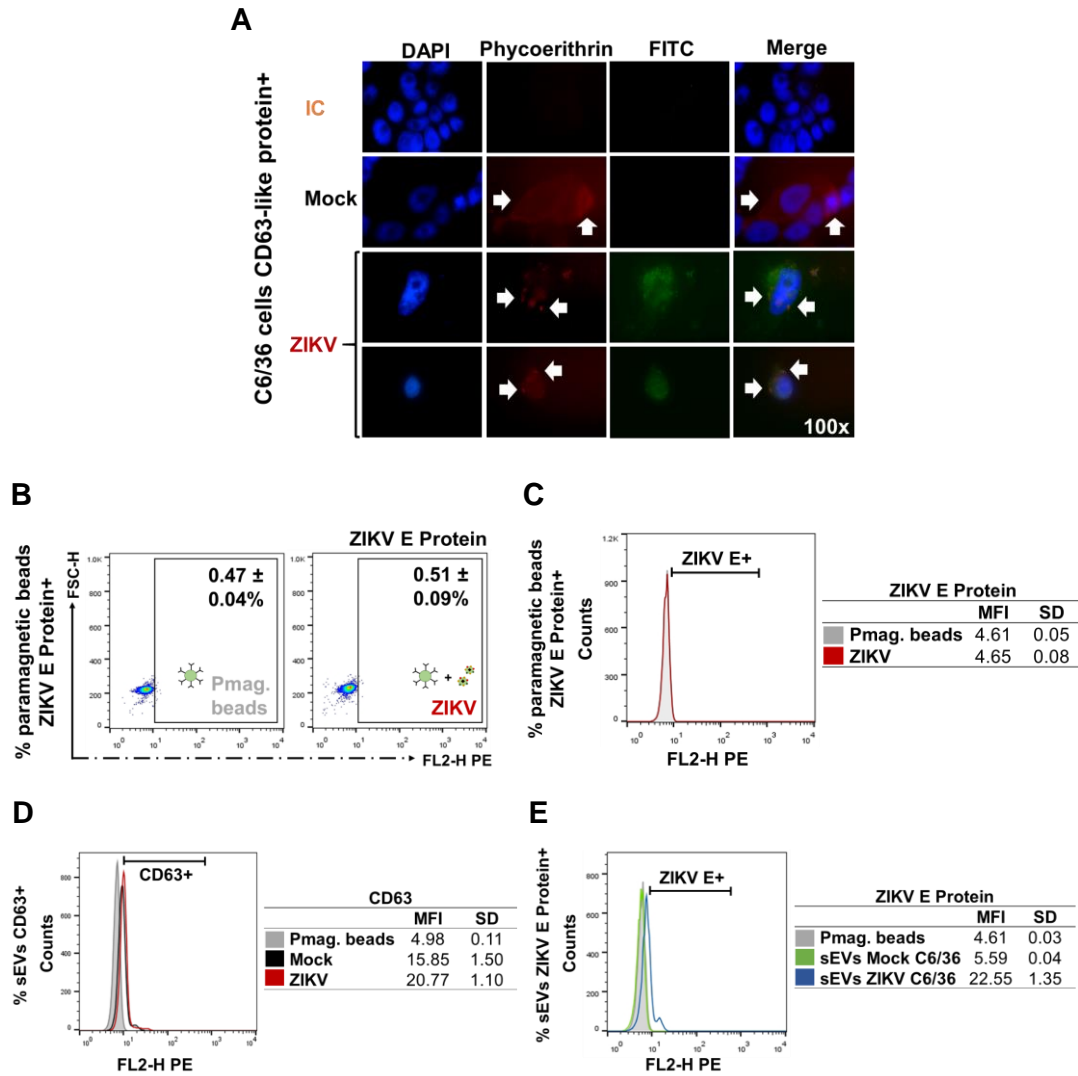

**Figure S9.** Identification of small EVs CD63+ from C6/36 cells. (A) CD63-like protein detection (red) by fluorescence microscopy (100x) in the Mock and ZIKV-infected cells (green for ZIKV E protein). (B) Detection of ZIKV coupled to paramagnetic beads coated with anti-CD63 by FACS. Dot plots are the representative mean  $\pm$  SD of the ZIKV E Protein+ (ZIKV coupled) from three independent experiments. (C) ZIKV E Protein+ MFI values from ZIKV coupled to paramagnetic beads. Histograms is the representative of the ZIKV E Protein+ distribution from three independent experiments. (D) CD63 MFI values. Histograms are the representative of sEVs CD63+ distribution from three independent experiments. (E) ZIKV E Protein MFI values. Histograms are the representative of sEVs ZIKV E Protein+ distribution from three independent experiments.

**A**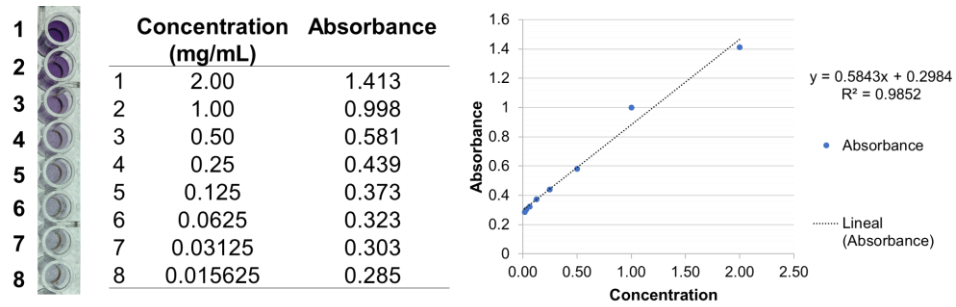**B**

|        | IEVs Mock C6/36   |                       | IEVs ZIKV C6/36   |                       | sEVs Mock C6/36   |                       | sEVs ZIKV C6/36   |                       |
|--------|-------------------|-----------------------|-------------------|-----------------------|-------------------|-----------------------|-------------------|-----------------------|
|        | Mean (Absorbance) | Concentration (mg/mL) | Mean (Absorbance) | Concentration (mg/mL) | Mean (Absorbance) | Concentration (mg/mL) | Mean (Absorbance) | Concentration (mg/mL) |
| Pool 1 | 0.579             | <b>0.480</b>          | 0.592             | <b>0.502</b>          | 0.585             | <b>0.491</b>          | 0.608             | <b>0.530</b>          |
| Pool 2 | 0.585             | <b>0.491</b>          | 0.598             | <b>0.512</b>          | 0.599             | <b>0.514</b>          | 0.612             | <b>0.537</b>          |
| Pool 3 | 0.589             | <b>0.497</b>          | 0.602             | <b>0.520</b>          | 0.582             | <b>0.485</b>          | 0.625             | <b>0.545</b>          |

**Figure S10.** Protein quantification of the EVs isolates. **(A)** Calibration curve obtained by BCA method. **(B)** Protein concentration (mg/mL) from EVs isolates. Values were calculated from the mean of absorbances obtained in three independent measures.



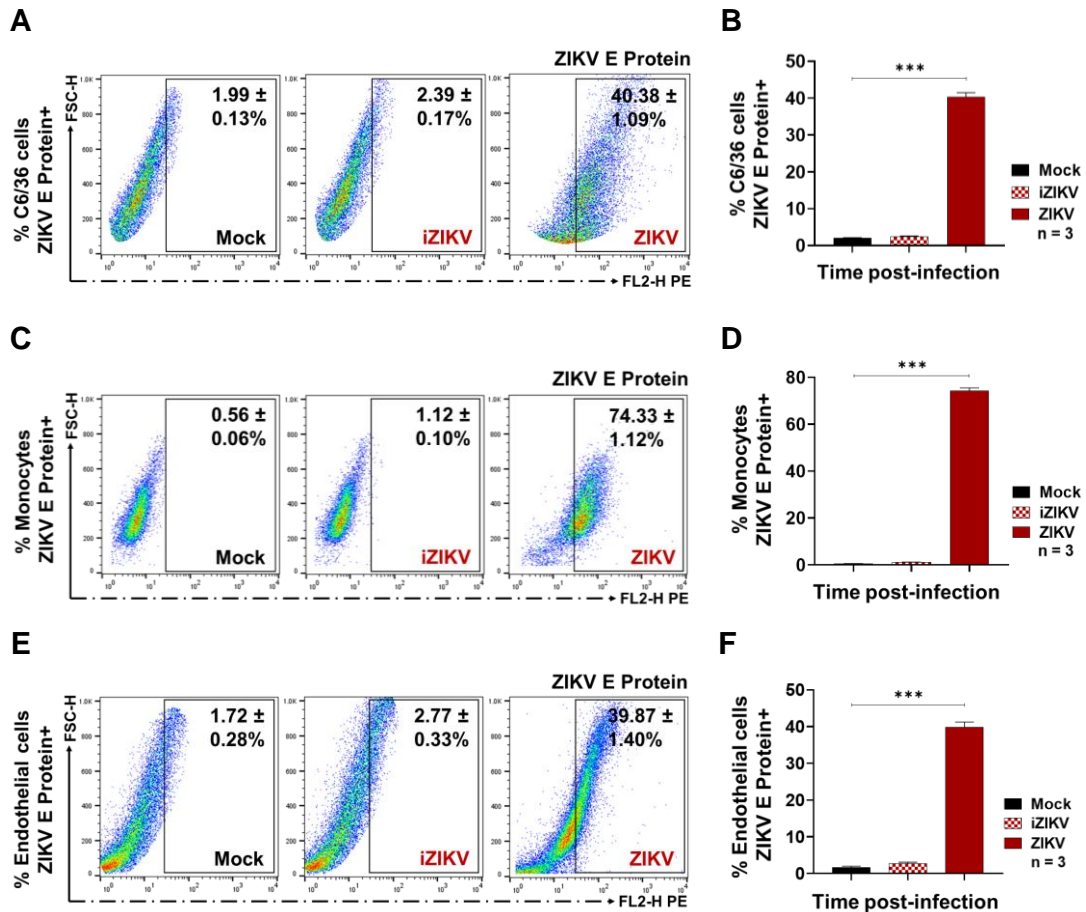

**Figure S11.** Inactivated ZIKV (iZIKV) does not infect C6/36, THP-1, or HMEC-1 cells. (A,C,E) ZIKV E protein detection at 48 h (C6/36), 96 h (THP-1), or 72 h (HMEC-1) PI by FACS assay, respectively. ZIKV stock was used as positive control. Dot plots are the representative mean  $\pm$  SD of the positive cells from three independent experiments. (B,D,F) ZIKV-infected cells percentages obtained by FACS. The ZIKV E protein levels were compared (by unpaired Student's t-test) with the Mock cells (\*) value. Statistical significance was recognized as \* when  $p < 0.05$ , \*\* when  $p < 0.01$ , and \*\*\* when  $p < 0.0001$ .

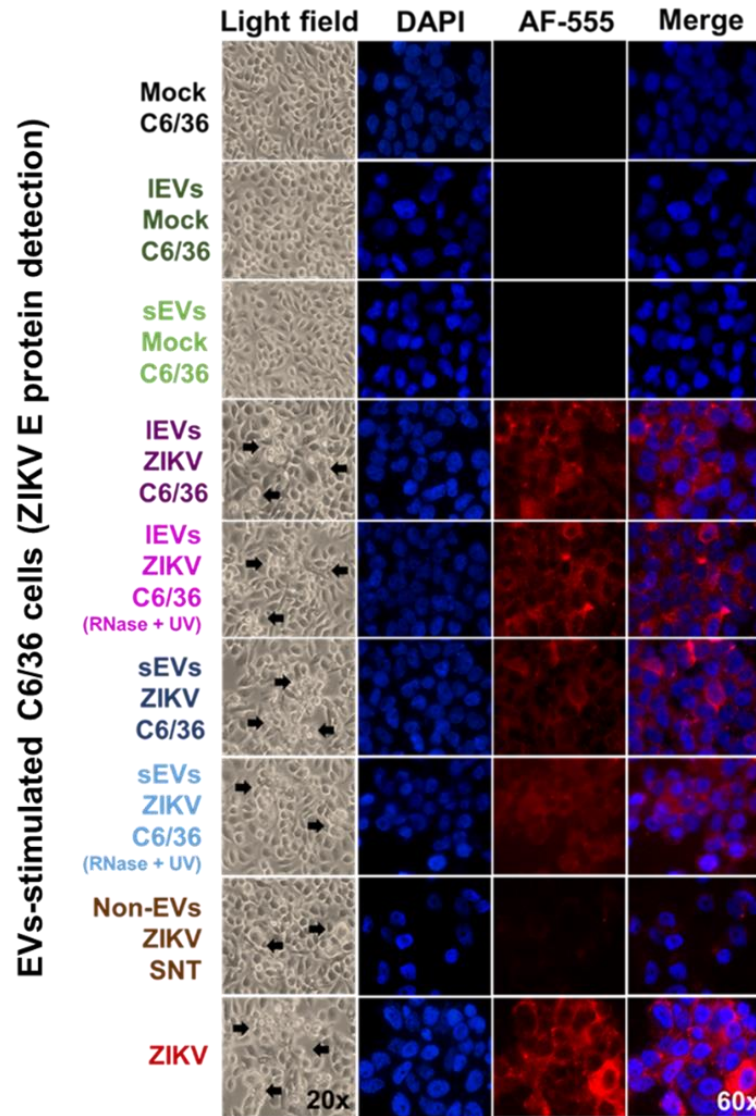

**Figure S12.** ZIKV C6/36 EVs-stimulated naïve C6/36 cells present ZIKV E Protein on their membranes (48 h PI). Cytopathic effects observation (black arrows) and ZIKV E protein detection (red) evaluated by light-field (20x) and fluorescence microscopy (60x), respectively.

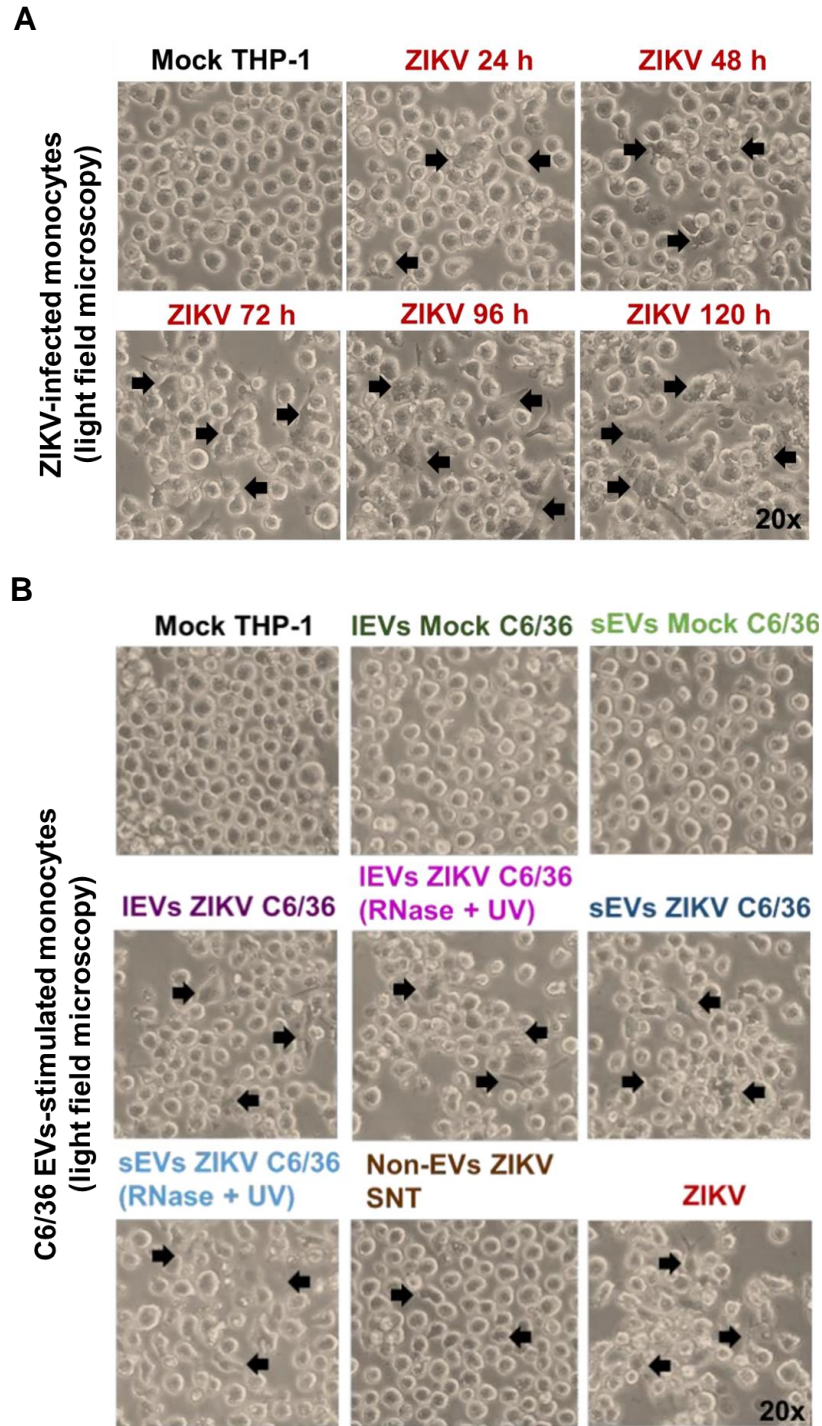

**Figure S13.** Microscopies from ZIKV-infected and C6/36 EVs-stimulated monocytes. (A) Cytopathic effects observation at 24, 48, 72, 96, and 120 h PI (black arrows) evaluated by light-field microscopy (20x). (B) Cytopathic effects observation at different EVs stimuli conditions (black arrows) evaluated by light-field microscopy (20x).

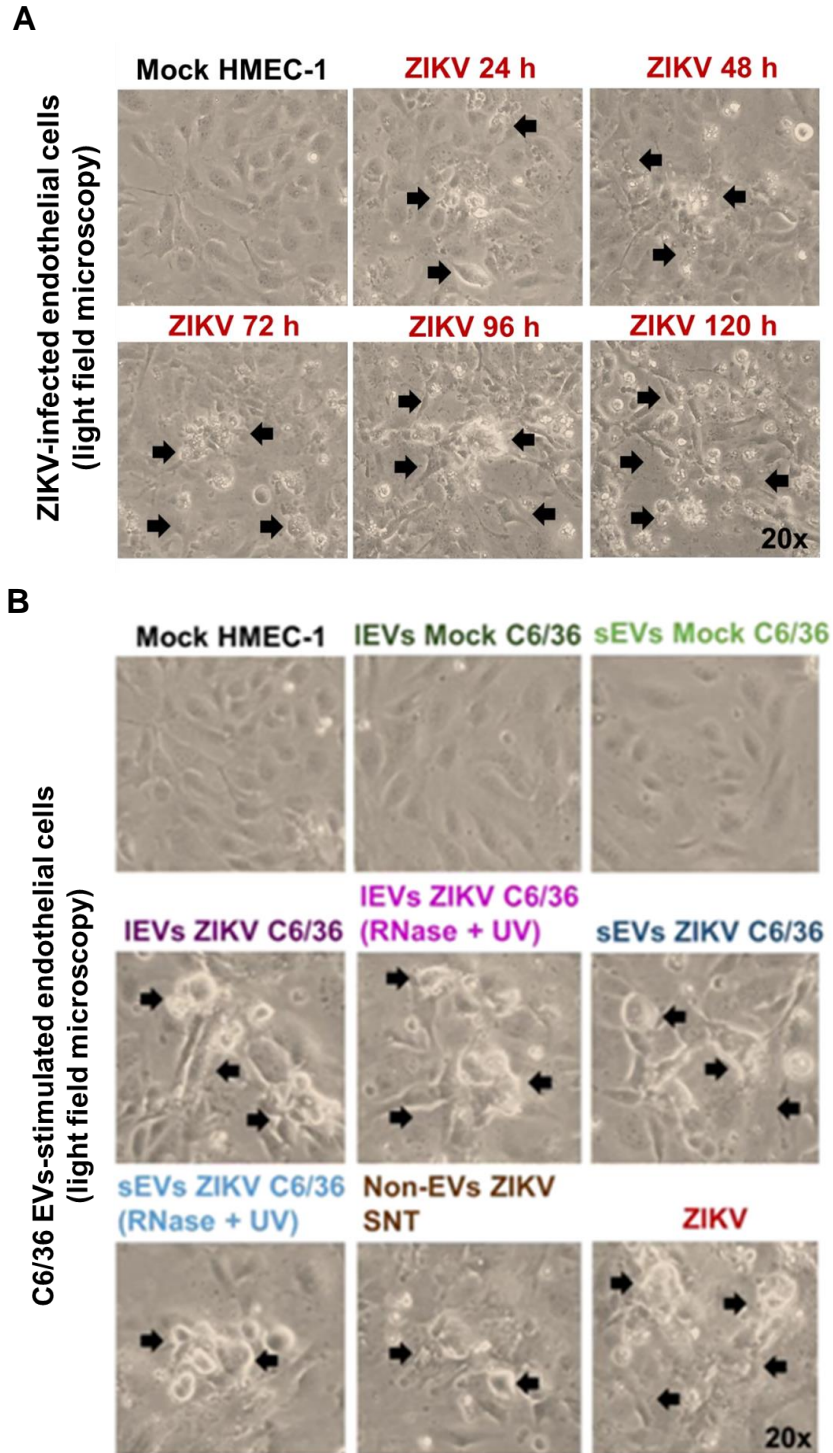

**Figure S14.** Microscopies from ZIKV-infected and C6/36 EVs-stimulated endothelial cells. (A) Cytopathic effects observation at 24, 48, 72, 96, and 120 h PI (black arrows) evaluated by light-field microscopy (20x). (B) Cytopathic effects observation at different EVs stimuli conditions (black arrows) evaluated by light-field microscopy (20x).
